# Supplementary material for: Gut bacterial aggregates as living gels
Source: eLife. 2021 Sep 7;10:e71105. doi: 10.7554/eLife.71105 (PMC8514234; doi:10.7554/eLife.71105)
Supplement: Figure 2—source data 1. [file elife-71105-fig2-data1.xlsx]

## Sheet: Fig2
strain	study	fish #
a01	1	1	3653	54	38	23	19	17	15	9	8	8	8	7	7	6	6	5	5	5	5	5	4	4	3	3	3	3	3	2	2	2	2	2	2	2	2	2	2	2	2	2	2	2	2	2	2	2	2
a01	1	2	148	82	63	60	19	9	7	6	6	5	4	4	3	3	3	3	3	3	3	3	2	2	2	2	2	2	2	2	2	2	2	2	2	2	2	2	2	2	2	2	2	2	2	1	1	1	1
a01	1	3	1422	318	40	29	19	17	5	5	4	3	3	3	3	2	2	2	2	1	1	1	1	1	1	1	1	1	1	1	1	1	1	1	1	1	1	1	1	1	1	1	1	1
a01	2	1	15	7	6	5	3	1	1	1	1	1	1	1	1	1	1	1	1	1	1	1	1	1	1
a01	2	2	96	73	3	3	3	2	2	2	2	2	1	1	1	1	1	1	1	1	1	1
a01	2	3	588	207	200	75	10	3	3	3	2	2	2	1	1	1	1	1	1	1	1	1	1	1	1	1	1	1	1	1	1	1	1
a02	1	1	284	129	118	23	9	6	4	3	3	3	3	2	2	2	2	1	1	1	1	1	1	1	1	1	1	1	1	1	1	1	1	1	1	1	1	1	1	1	1	1	1
a02	1	2	161	75	41	33	29	13	13	12	12	12	12	11	10	9	9	9	9	9	9	8	8	7	7	7	6	6	5	5	5	5	5	5	4	4	4	4	4	4	4	4	4	4	4	3	3	3	3
a02	1	3	26	23	15	10	7	6	5	4	3	3	3	3	3	3	3	3	3	2	2	2	2	2	2	2	2	2	2	2	2	2	2	1	1	1	1	1	1	1	1	1	1	1	1	1	1	1	1
a02	2	1	1397	116	112	72	48	42	39	39	25	20	17	15	12	12	10	10	8	8	5	5	4	4	4	4	4	3	3	3	3	3	3	3	3	3	3	2	2	2	2	2	2	2	2	2	2	2	2
a02	2	2	527	59	57	38	18	15	12	11	11	10	8	7	7	6	6	6	6	5	5	5	5	5	5	4	4	4	4	4	4	4	4	3	3	3	3	3	3	3	3	3	3	3	3	3	3	3	3
a02	2	3	211	159	66	50	38	31	26	21	20	17	16	16	15	15	15	13	12	11	11	10	10	10	10	10	9	9	9	7	7	7	7	7	7	7	6	6	5	5	5	5	4	4	4	4	4	4	4
ent	1	1	9383	2855	92	76	52	17	14	13	7	6	6	5	4	4	1	1	1	1	1	1	1	1	1	1	1	1	1	1	1	1	1	1	1	1
ent	1	2	5977	92	32	8
ent	1	3	27252	223	41	28	19	17	17	10	9	9	8	8	7	7	7	6	6	6	6	5	5	5	5	5	5	5	5	5	5	5	5	5	5	4	4	4	4	4	4	4	4	4	4	4	4	4	4
ent	2	1	888	3
ent	2	2	30	24	22	5	3	2	1	1
ent	2	3	106	79	66	20	19	17	15	11	10	9	9	8	8	7	6	6	6	6	5	5	5	5	4	4	4	4	4	4	4	4	4	4	4	4	3	3	3	3	3	3	3	3	3	3	2	2	2
ent	4	1	43597	664	47	17	13	12	11	10	10	9	8	7	6	6	6	6	5	5	4	4	4	4	4	4	3	3	3	3	3	3	3	3	3	3	3	3	3	2	2	2	2	2	2	2	2	2	2
ent	4	2	26341	197	57	22	16	11	10	9	5	3	3	3	3	3	2	2	2	2	2	2	2	2	1	1	1	1	1	1	1	1	1	1	1	1	1	1	1	1	1	1	1	1	1	1	1	1	1
ent	4	3	38194	126	46	46	30	23	21	20	19	17	16	15	14	14	12	10	10	9	9	9	9	9	9	9	8	7	7	7	7	7	7	7	6	6	6	6	6	6	5	5	5	5	5	5	5	5	4
ent	4	4	152	41	31	14	12	11	11	9	8	8	7	6	6	6	5	5	5	4	4	4	4	4	3	3	3	3	3	3	3	3	3	3	3	3	3	3	3	3	3	3	3	3	2	2	2	2	2
ent	4	5	5693	2077	35	8	4	3	2	1	1	1	1	1	1	1	1	1	1	1	1	1	1	1	1
ent	4	6	17454	210	88	82	65	49	48	35	32	32	21	18	17	16	16	16	13	12	12	11	10	10	9	8	8	8	8	7	7	7	7	6	6	6	6	6	5	5	5	5	5	5	5	5	5	4	4
ent	4	7	7953	225	44	4	1	1	1
ent	4	8	4229	3933	189	132	54	47	27	23	21	21	13	11	11	10	9	8	8	7	6	5	5	5	5	4	4	4	4	4	4	3	3	3	3	3	2	2	2	2	2	2	2	2	2	2	2	2	2
ent	4	9	20714	877	177	162	46	41	36	25	20	16	13	11	10	10	10	9	8	8	7	7	7	6	6	6	6	5	5	5	5	5	5	4	4	4	4	4	4	4	4	4	3	3	3	3	3	3	3
ent	4	10	3880	77	55	55	54	40	38	23	17	13	11	10	10	8	8	8	7	7	7	5	5	5	4	4	4	3	3	3	3	3	3	3	3	2	2	2	2	2	2	2	2	2	2	2	2	2	2
ent	4	11	47403	402	286	52	44	25	20	8	8	8	6	6	5	5	4	4	3	3	3	3	3	3	3	3	3	2	2	2	2	2	2	2	2	2	2	2	2	2	2	2	2	2	2	1	1	1	1
ent	4	12	2131	1218	3	2	1	1	1
pls	1	1	4499	10	8	5	5	5	4	3	2	2	2	2	2	2	2	2	2	2	2	2	2	2	2	1	1	1	1	1	1	1	1	1	1	1	1	1	1	1	1	1	1	1	1	1	1	1	1
pls	1	2	16129	1240	1109	609	144	135	14	13	7	3	3	2	2	2	2	1	1	1	1	1	1	1	1	1	1	1	1	1	1	1	1	1	1	1	1	1	1	1	1	1	1	1	1	1	1	1	1
pls	1	3	107	38	37	13	10	8	6	5	5	4	3	3	3	2	2	2	2	1	1	1	1	1	1	1	1	1	1	1	1	1	1	1	1	1	1	1	1	1	1	1	1	1	1	1	1	1	1
psd	1	1	11085	6	4	4	4	3	3	2	2	2	1	1	1	1	1	1	1	1	1	1	1	1	1	1	1	1	1	1	1
psd	1	2	333	2	2	1	1
psd	1	3	13432	44	36	25	14	12	5	4	4	4	3	2	2	2	2	1	1	1	1	1	1	1	1	1	1	1	1	1	1	1	1	1	1	1	1	1	1	1	1	1	1	1	1	1	1	1	1
psd	2	1	324	14	8	3	3	1	1
psd	2	2	91	12	11	4	4	3	2	2	2	1	1	1	1	1	1	1	1	1	1	1
psd	2	3	7	1	1
z20-che	3	1	426	184	40	36	26	22	21	21	11	10	8	8	7	7	7	7	6	6	6	6	6	6	5	5	5	5	5	5	5	5	5	4	4	4	4	4	4	4	4	4	4	4	4	3	3	3	3
z20-che	3	2	116	29	27	20	19	18	10	8	8	7	7	6	6	5	4	4	4	3	3	3	3	3	3	3	3	3	3	2	2	2	2	2	2	2	2	2	2	2	2	2	2	1	1	1	1	1	1
z20-che	3	3	160	40	34	29	16	11	10	10	9	9	9	8	8	8	7	7	6	6	5	5	5	5	5	5	4	4	4	4	4	4	4	4	3	3	3	3	3	3	3	3	3	3	3	3	3	3	3
z20-che	3	4	1477	507	434	218	218	164	128	113	103	90	85	84	75	75	69	60	48	44	42	34	30	28	25	22	17	17	14	14	13	13	12	12	11	10	8	8	8	7	7	7	7	7	7	6	6	5	5
z20-che	3	5	15829	5788	5759	4687	867	271	213	198	60	39	32	30	28	22	20	19	19	17	17	17	17	15	15	14	14	12	12	12	12	11	11	11	11	11	11	11	11	10	10	10	10	10	10	10	10	10	10
z20-che	3	6	359	104	79	3	2	2	2	1	1	1	1	1	1	1	1	1	1	1
z20-che	3	7	614	586	399	272	216	15	6	6	6	6	5	5	5	5	5	5	5	5	4	4	4	4	4	4	4	4	4	4	4	4	4	4	3	3	3	3	3	3	3	3	3	3	3	3	3	3	3
z20-che	3	8	1250	853	379	265	237	165	131	93	84	65	57	39	35	12	12	12	10	9	9	9	8	8	7	7	7	7	6	6	6	6	6	6	6	5	5	5	5	5	5	5	5	4	4	4	4	4	4
z20-che	3	9	1964	1198	1029	859	702	305	264	218	185	91	89	67	65	63	52	51	47	39	35	30	30	29	28	28	26	21	20	20	20	19	19	17	16	16	16	15	15	15	15	14	14	13	12	12	11	11	11
z20-che	3	10	1068	126	31	28	28	22	21	21	11	9	7	6	5	5	4	4	4	4	3	3	3	3	3	3	3	3	2	2	2	2	2	2	2	2	2	2	2	2	2	2	2	2	2	2	2	2	2
z20-che	3	11	225	166	145	62	25	4	4	4	4	3	3	2	2	1	1	1	1	1	1	1	1	1	1	1
z20-mot	3	1	37	22	13	11	10	10	10	9	9	8	8	5	5	4	4	4	4	3	3	3	3	3	3	3	3	3	3	3	3	3	3	2	2	2	2	2	2	2	2	2	2	2	2	2	2	2	2
z20-mot	3	2	6094	1219	346	264	147	18	14	8	8	5	5	5	4	4	4	3	3	2	2	2	2	2	2	1	1	1	1	1	1	1	1	1	1	1	1	1	1	1	1	1	1	1	1	1	1	1	1
z20-mot	3	3	3031	2481	1897	454	76	35	26	23	16	15	14	14	11	10	9	9	7	7	6	6	6	6	6	6	6	5	5	5	5	5	4	4	4	4	4	4	3	3	3	3	3	3	3	3	3	3	3
z20-mot	3	4	146	89	40	39	36	35	22	16	16	16	15	15	12	11	11	9	9	9	8	8	8	8	8	7	7	7	7	6	6	5	5	5	5	5	5	5	5	5	5	5	4	4	4	4	4	4	4
z20-mot	3	5	4687	867	271	213	55	30	24	19	19	17	14	12	11	11	10	10	10	10	10	9	7	7	7	6	5	5	5	5	4	4	4	4	4	4	4	4	4	3	3	3	3	3	3	3	3	3	3
z20-mot	3	6	4773	4318	2447	1524	1302	793	681	418	125	55	38	30	30	15	15	15	14	13	13	13	12	12	11	10	9	8	8	8	8	8	7	7	6	6	6	5	4	4	4	4	4	4	4	3	3	3	3
z20-mot	3	7	17	12	12	8	8	8	7	7	6	6	6	5	5	5	5	4	4	4	4	3	3	3	3	3	3	3	3	3	3	3	3	3	2	2	2	2	2	2	2	2	2	2	2	2	2	2	2
z20-mot	3	8	1128	558	296	233	106	97	67	61	50	40	38	38	36	36	32	27	26	24	24	22	22	21	20	20	19	18	16	16	16	15	14	13	13	12	12	12	11	10	9	9	9	9	9	9	9	8	8
z20-mot	3	9	3467	8	5	3	2	1	1	1	1	1	1	1	1	1	1
z20-mot	3	10	112	9	5	2	1	1	1	1	1
z20-mot	3	11	1499	14	10	7	6	5	3	3	3	2	2	2	2	1	1	1	1	1	1	1	1	1	1	1	1	1	1	1	1	1	1	1	1	1	1	1
z36	1	1	3600	1544	321	18	5	4	4	4	3	3	2	2	2	2	2	2	2	2	1	1	1	1	1	1	1	1	1	1	1	1	1	1	1	1	1	1	1	1	1	1	1	1	1	1	1	1	1
z36	1	2	882	147	145	20	15	13	11	9	8	7	7	6	6	6	6	5	5	5	5	5	5	5	5	4	4	4	4	4	4	4	4	4	4	4	4	4	3	3	3	3	3	3	3	3	3	3	3
z36	1	3	3	2	2	2	2	2	1	1	1	1	1	1	1
z36	2	1	225	86	22	11	11	8	7	7	7	5	5	5	5	5	5	4	4	4	3	3	3	3	3	3	3	3	3	3	3	3	3	2	2	2	2	2	2	2	2	2	2	2	2	2	2	2	2
z36	2	2	1257	14	7	5	4	3	2	2	2	2	2	1	1	1	1	1	1	1	1	1	1	1	1	1	1	1	1	1	1	1	1	1	1	1	1	1	1	1	1	1	1	1	1	1	1	1	1
z36	2	3	902	400	30	21	14	14	13	12	12	11	11	11	10	10	10	9	9	9	8	8	8	8	7	7	7	6	6	6	6	6	6	6	6	6	5	5	5	5	5	5	5	5	5	5	5	5	5
[truncated: 1,522 more columns]
