# Supplementary material for: Gut bacterial aggregates as living gels
Source: eLife. 2021 Sep 7;10:e71105. doi: 10.7554/eLife.71105 (PMC8514234; doi:10.7554/eLife.71105)
Supplement: Figure 3—source data 1. [file elife-71105-fig3-data1.xlsx]

## Sheet: Fig3D
nu_F	beta/r	mean exponent	std. dev exponent	mean log10(min size)	std. dev log10(min size)
1	0.2	2.2135	0.0219446	1.13959	0.151624
1	0.333334	2.4515	0.0314104	1.2112	0.165275
1	0.466666	2.793	0.0530485	1.26879	0.135425
1	0.6	3.2663	0.107867	1.23841	0.138268
0.666667	0.2	1.8189	0.0124961	0.560128	0.124708
0.666667	0.4	1.9825	0.0111351	0.599991	0.126999
0.666667	0.6	2.1392	0.0105773	0.559646	0.103243
0.666667	0.8	2.3031	0.00977474	0.551736	0.0700954
0.666667	1	2.4859	0.0101995	0.58082	0.0471675
0.666667	1.2	2.6888	0.0077303	0.599561	0.0175795
0.666667	1.4	2.9163	0.0122643	0.611471	0.0333425
0.666667	1.6	3.1908	0.0224724	0.671835	0.0437317
0	0.2	1.2254	0.108937	0.316002	0.808148
0	0.4	1.3222	0.0183831	0.100642	0.227006
0	0.6	1.4278	0.0146253	0.0761775	0.21658
0	0.8	1.5256	0.0190385	0.173573	0.297135
0	1	1.6128	0.0237997	0.246507	0.343966
0	1.2	1.6843	0.0377138	0.373065	0.434976
0	1.4	1.7509	0.0532479	0.472577	0.513525
0	1.6	1.8238	0.0709827	0.444927	0.548596
