# Supplementary material for: Gut bacterial aggregates as living gels
Source: eLife. 2021 Sep 7;10:e71105. doi: 10.7554/eLife.71105 (PMC8514234; doi:10.7554/eLife.71105)
Supplement: Supplementary file 1. — The small size regime of the cluster size distributions were fit to a power-law model for sizes up to 100 cells using two methods: a linear fit to P(size>n) and maximum likelihood estimation (Materials and methods). The fits were done for each animal and the resulting mean ± std. dev of the exponents (corresponding to μ-1, as defined in the text) are given for each strain. For each method, the fits were done twice, once including single cells, and once considering only cells of size two or greater. As discussed in the main text, the largest uncertainty in cluster size enumeration from the images occurs at small sizes. Ignoring single cells in the fit only mildly changes the average exponent, and all changes are within uncertainties. Most exponents are consistent with μ-1=1. [file elife-71105-supp1.xlsx]

## Sheet: Sheet1
Supplementary File 1
Gut bacterial aggregates as living gels, Brandon H Schlomann and Raghuveer Parthasarathy (2021
Power-law exponents for cluster size distributions, calculated in various ways.
Fitting exponents: linear fit to log P(size>n) vs. log (n), and maximum likelihood estimation.
Assess the impact of the single-cell count uncertainty on the distribution, fits for clusters sizes up to 100 cells(i) including single cells and (ii) considering only cells of size 2–100
	linear fit to reverse cumulative distributions				maximum likelihood
	nmin=1		nmin=2		nmin=1		nmin=2
bacterial strain	mean	std. dev	mean	std. dev	mean	std. dev	mean	std. dev
Aeromonas ZOR0001	0.6	0.2	0.7	0.4	1.1	0.2	0.9	0.2
Aeromonas ZOR0002	0.9	0.2	0.9	0.3	1.4	0.2	1.2	0.1
Enterobacter ZOR0014	0.7	0.3	0.8	0.3	1.2	0.4	0.9	0.3
Plesiomonas ZOR0011	0.8	0.5	0.7	0.4	1.5	0.1	1.2	0.5
Pseudomonas ZWU0006	0.9	0.4	1	0.6	0.9	0.3	0.9	0.3
Vibrio ZOR0036	1.4	0.7	1.1	0.4	1.5	0.1	1.6	0.3
Vibrio ZWU0020 Delta mot	0.8	0.3	0.9	0.4	1.4	0.3	1.2	0.4
Vibrio ZWU0020 Delta che	0.8	0.2	0.9	0.3	1.4	0.3	1	0.2
