# Supplementary figures and images for: Gut bacterial aggregates as living gels
Source: eLife journal article supplement (doi:10.7554/elife.71105), 2021-09-07

$$\nu_F = 1, \beta/r = 0.1$$

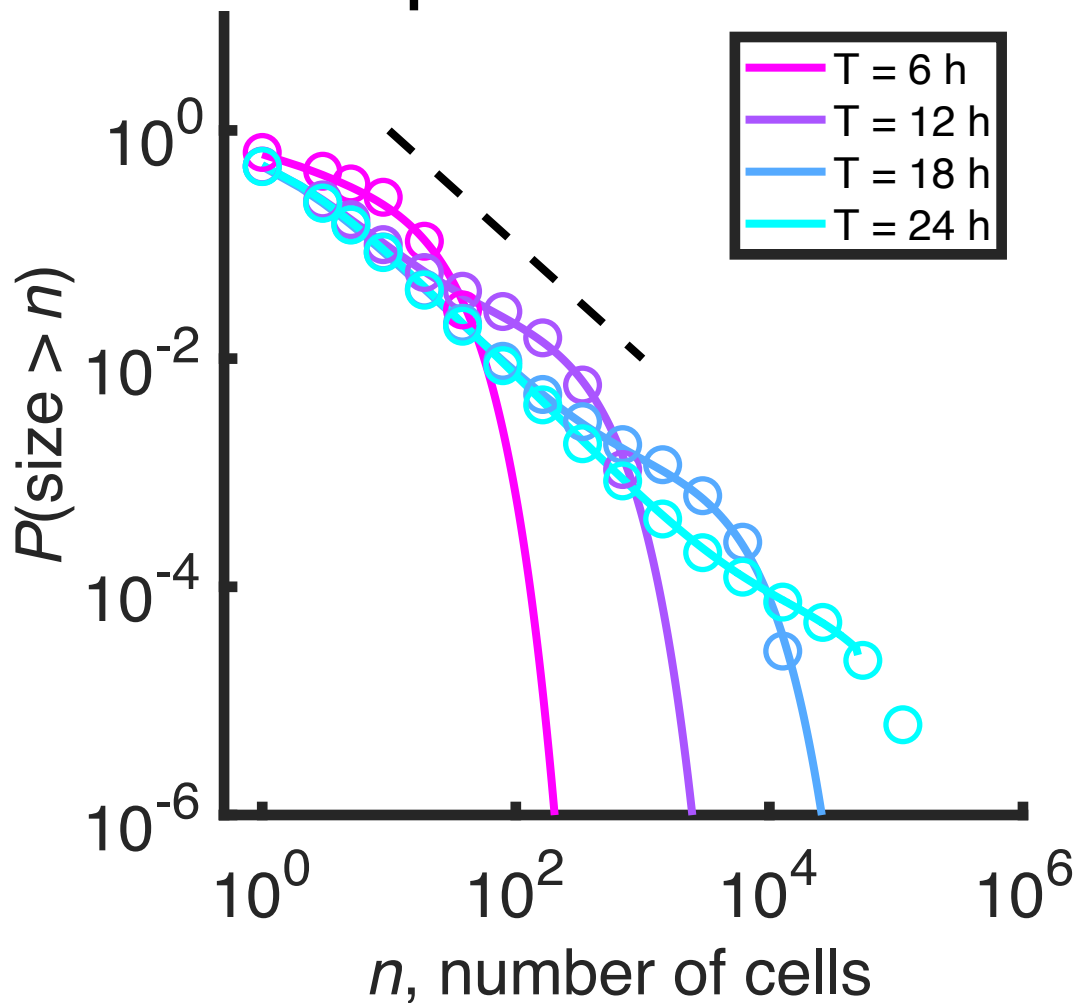

Supplement: supp [file elife-71105-supp-v1.zip]

individual z slices

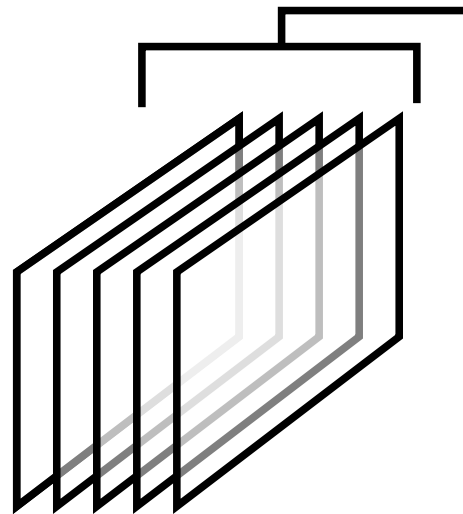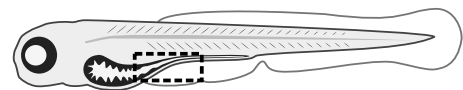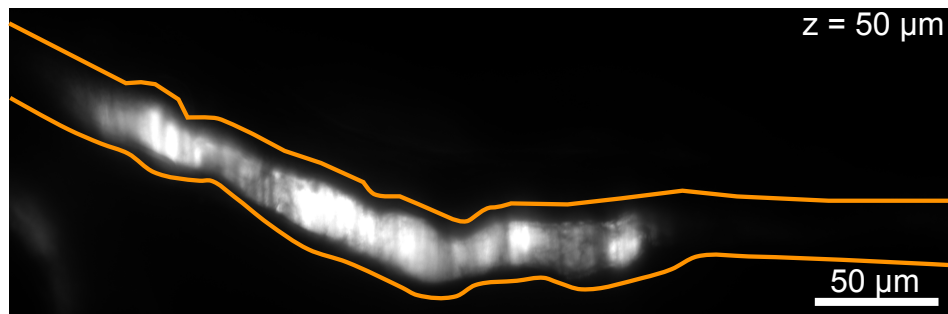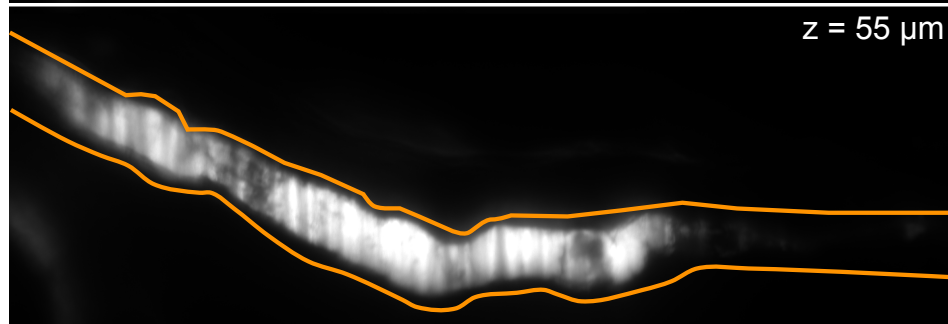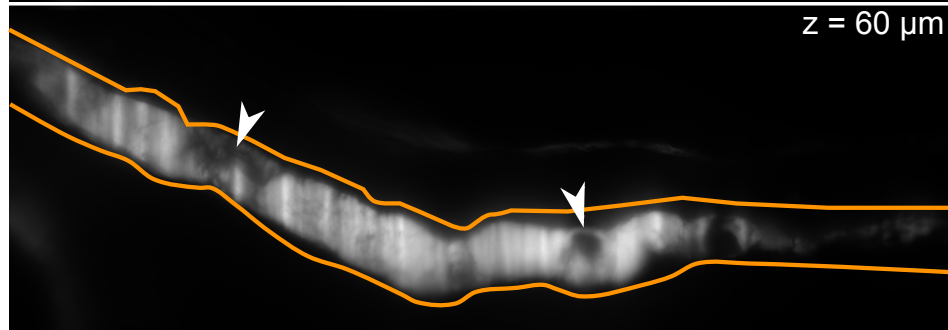

Supplement: supp [file elife-71105-supp-v1.zip]

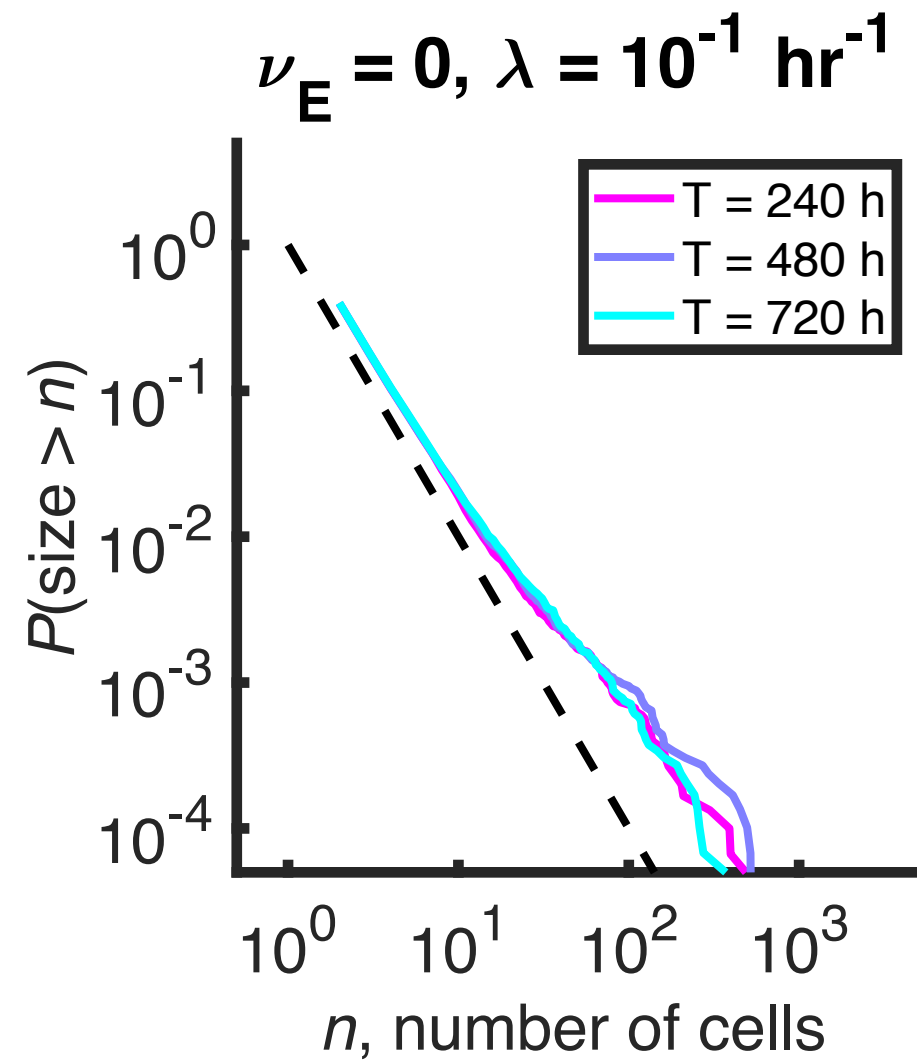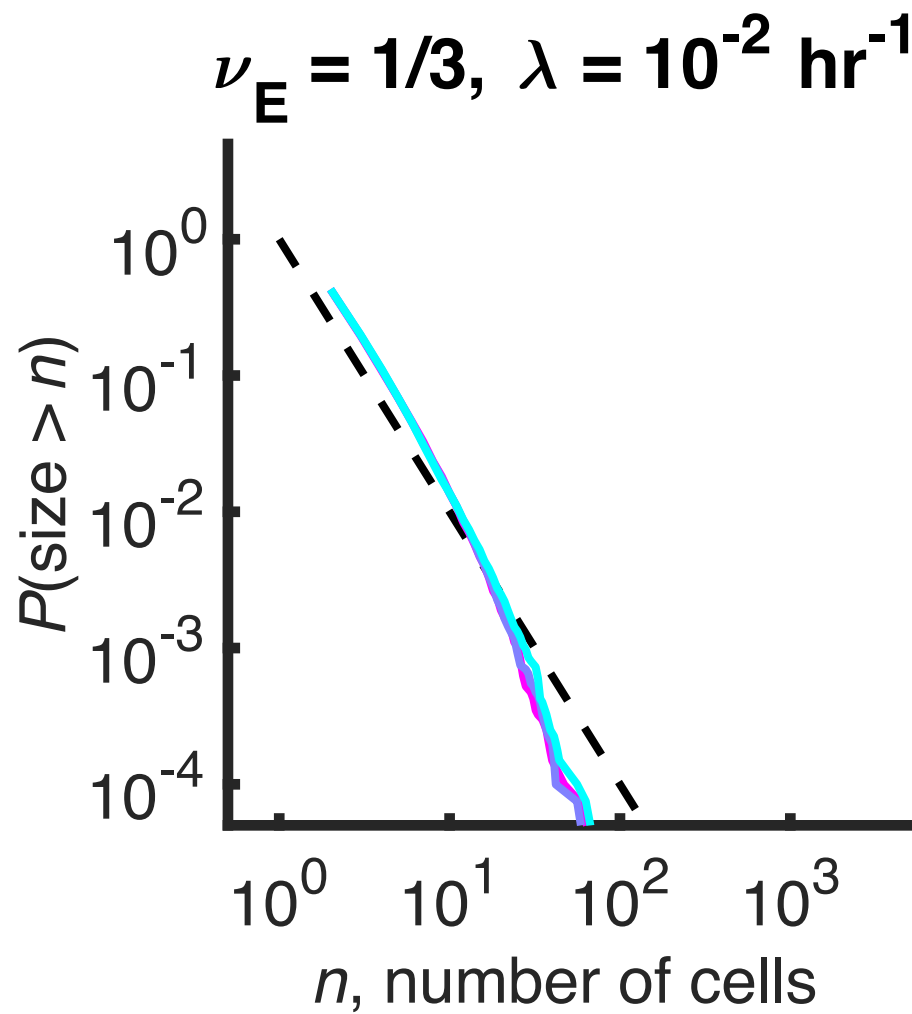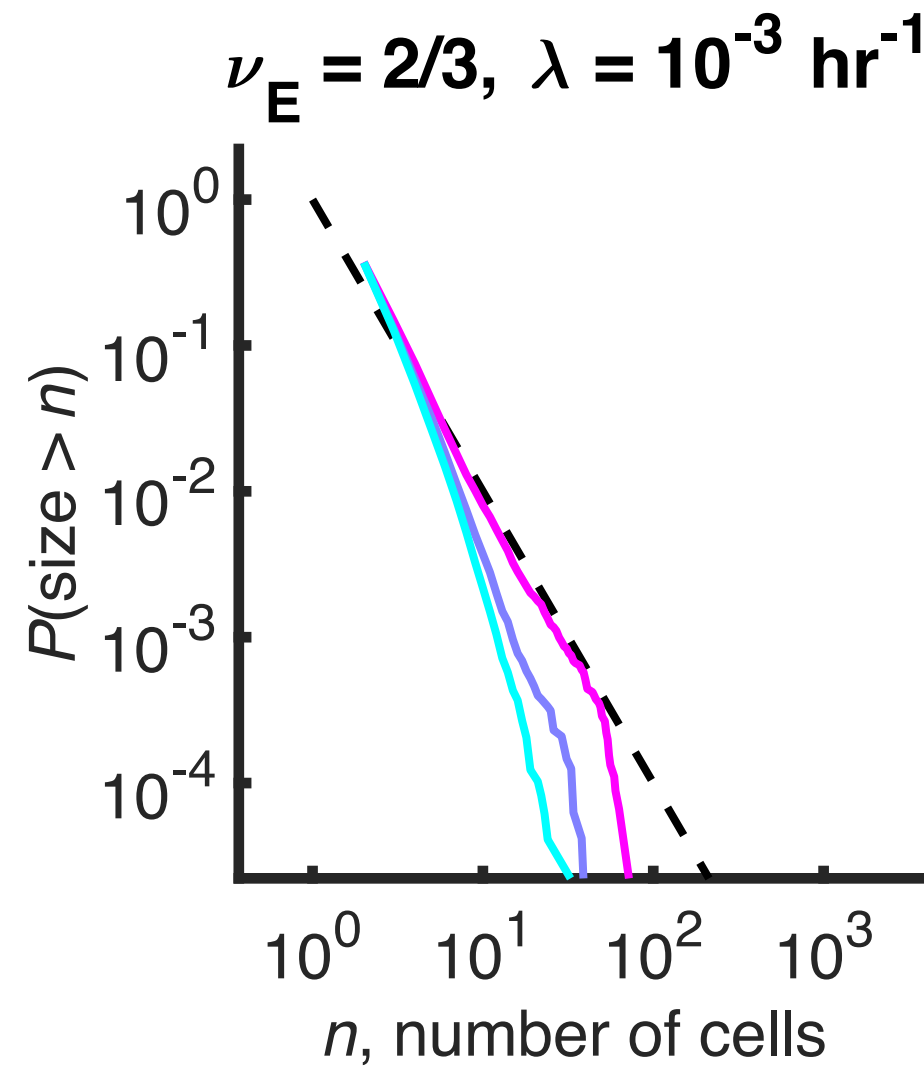

Supplement: supp [file elife-71105-supp-v1.zip]

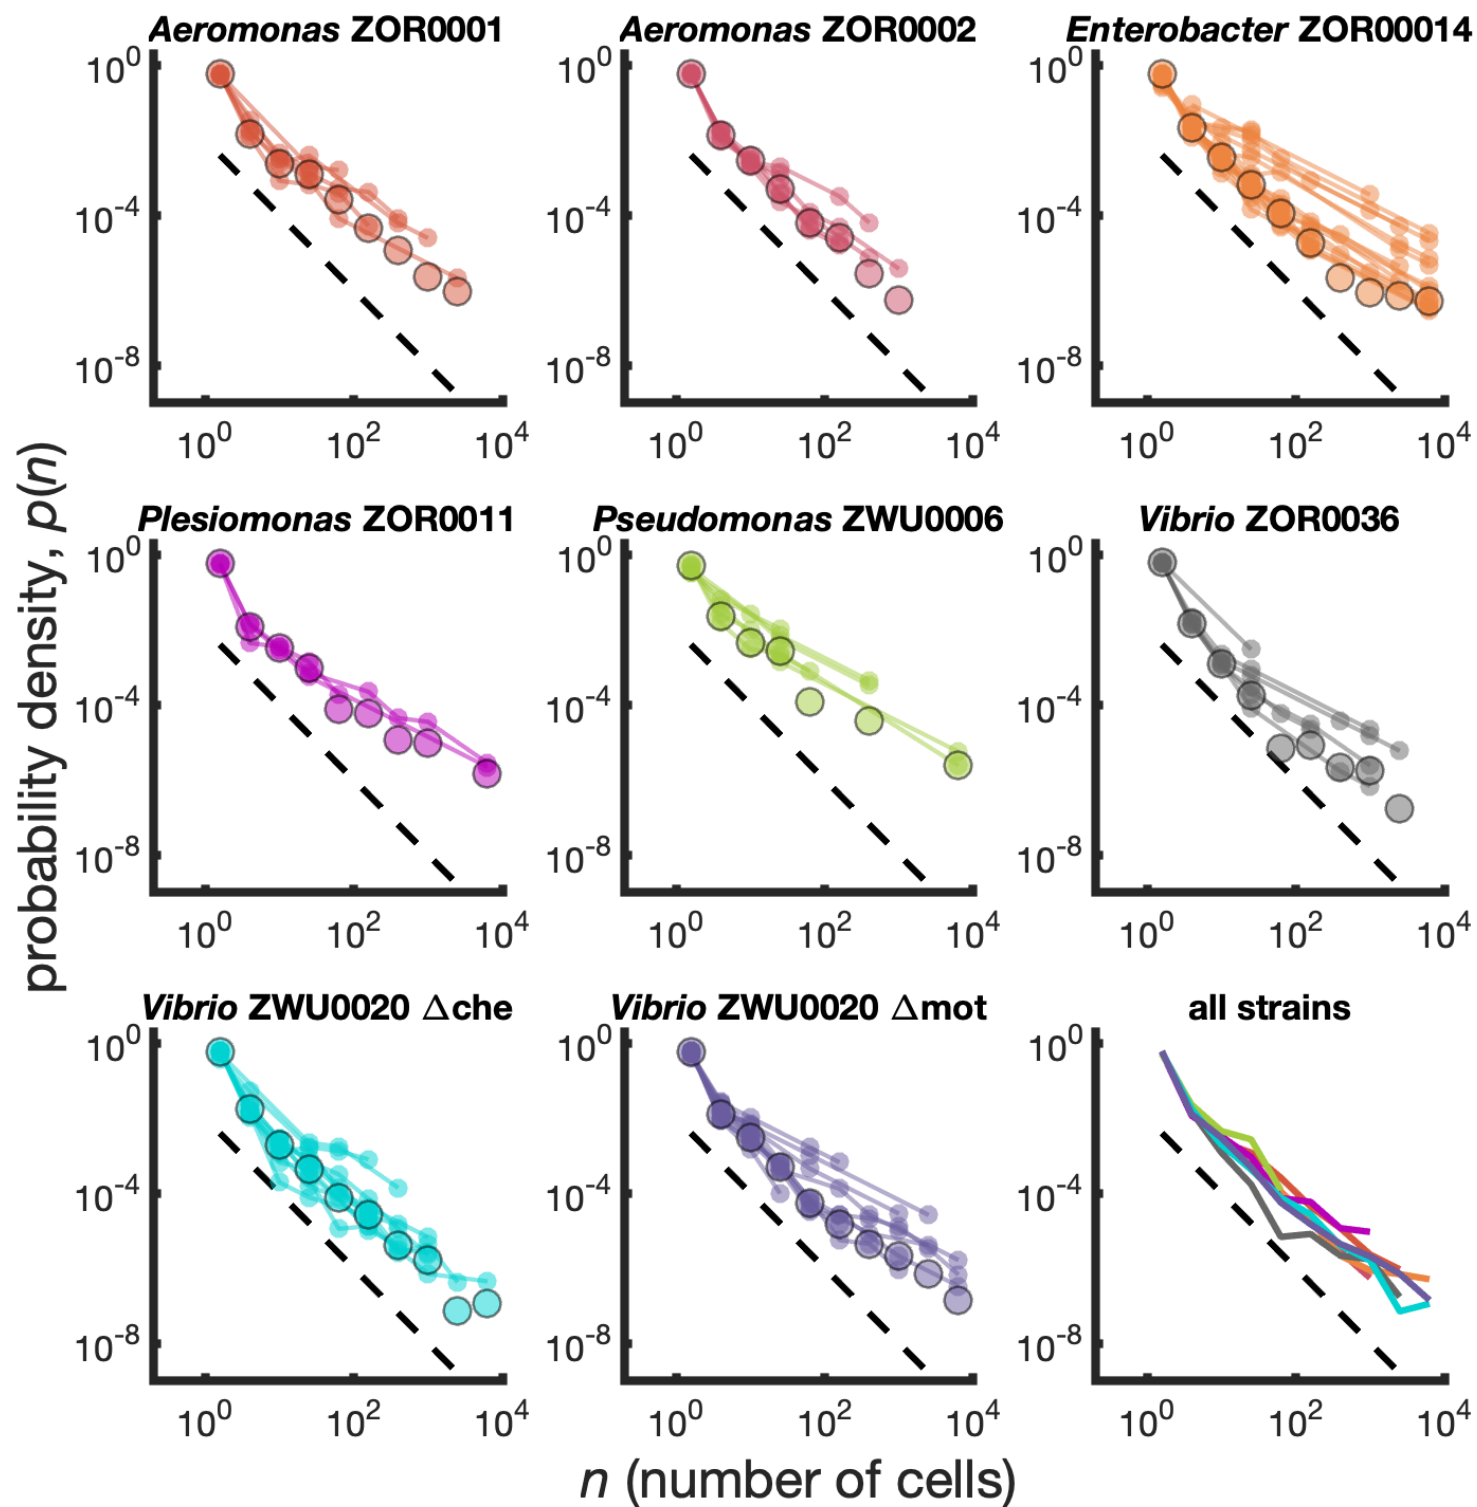

Supplement: supp [file elife-71105-supp-v1.zip]

**aggregation only,  $\nu_A = 1$**

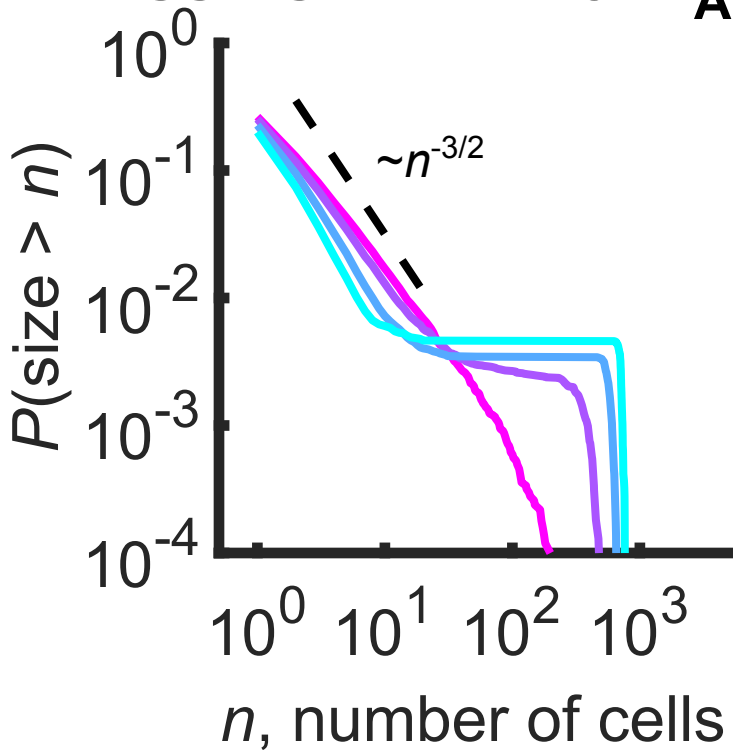

Supplement: supp [file elife-71105-supp-v1.zip]
